# Supplementary material
Source: PubMed Central journal article supplement (PMC2901842)
Supplement: NIHMS206941-supplement-01.pdf [file NIHMS206941-supplement-01.pdf]

**Inventory of Supplemental Information.**

**1. Supplemental figures.**

**Figure S1.** Related to Figure 1.

**Figure S2.** Related to Figure 2.

**Figure S3.** Related to Figure 4.

**2. Supplemental tables.**

**Table S1.** Related to Figure 1

**Table S2.** Related to Figure 6

**Table S3.** Related to Figure 6

**3. Supplemental experimental procedures.**

# Supplemental Figures

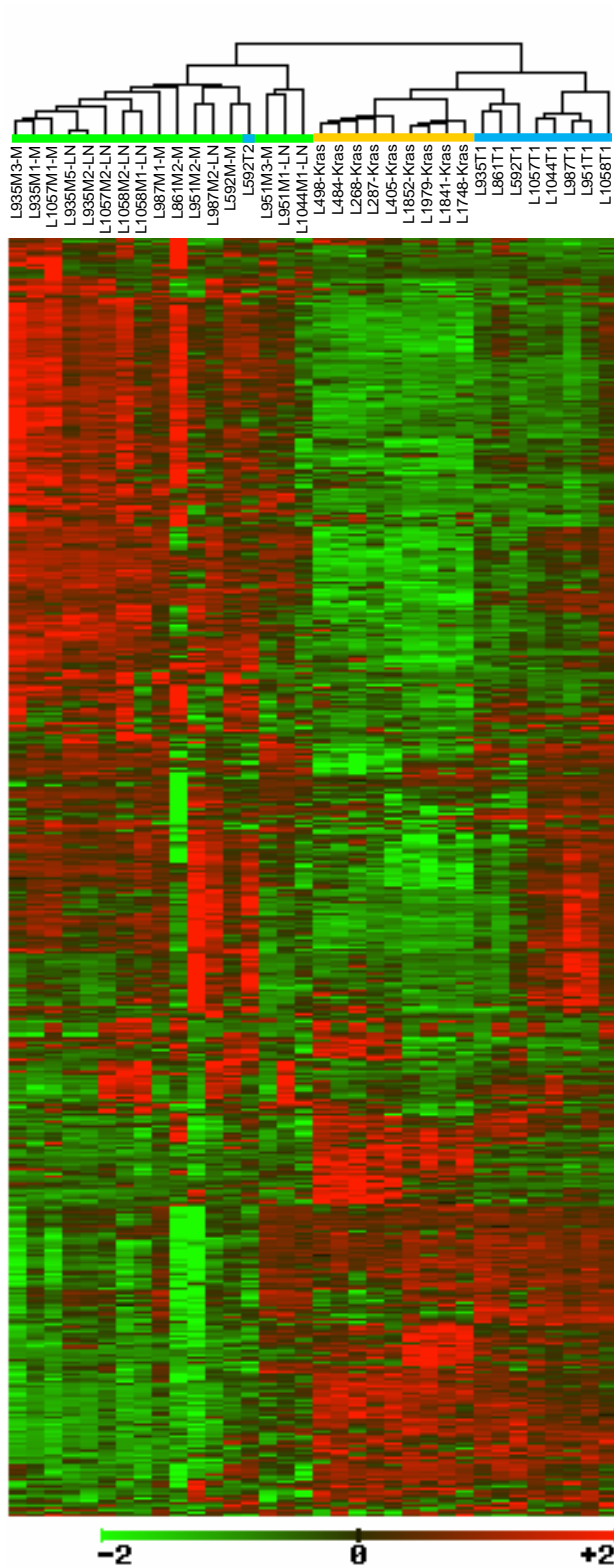

A

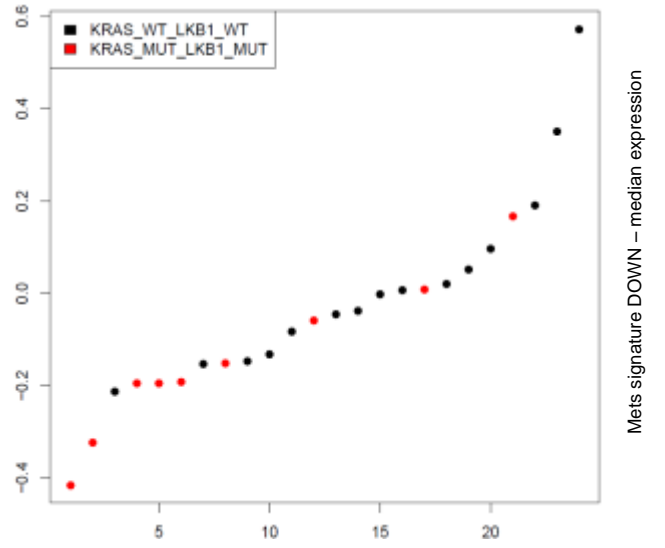

B

Sorted samples

sion

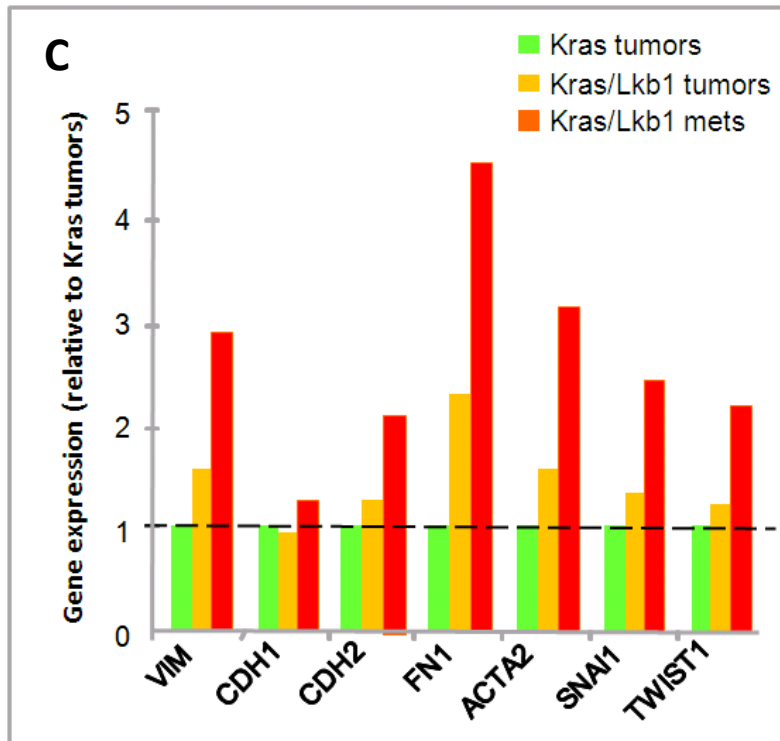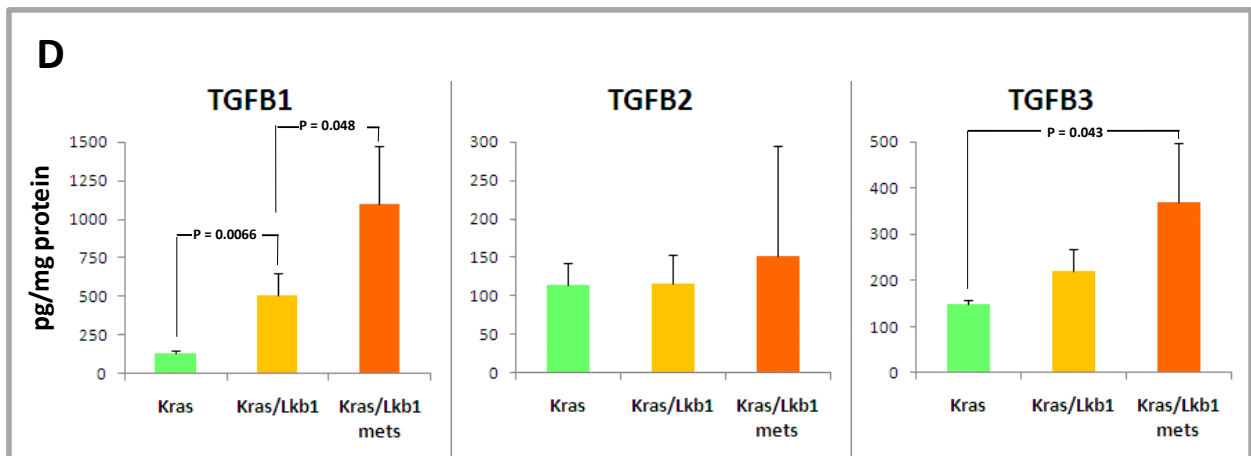

**E**

*Kras*  
primary tumor

*Kras/Lkb1*  
primary tumor

*Kras/Lkb1*  
metastasis

VIMENTIN

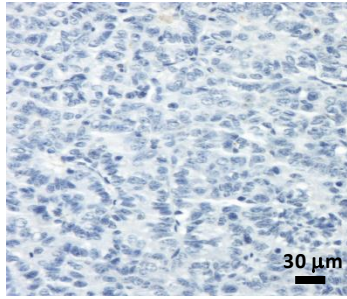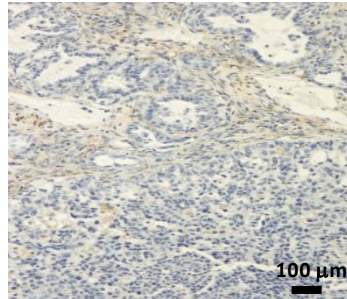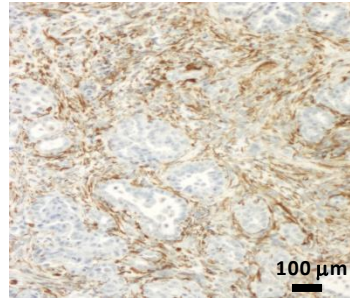

E-CADHERIN

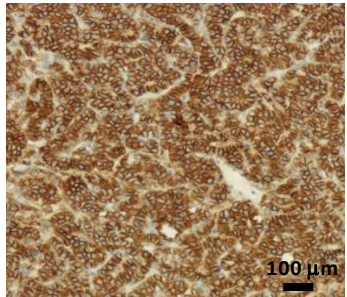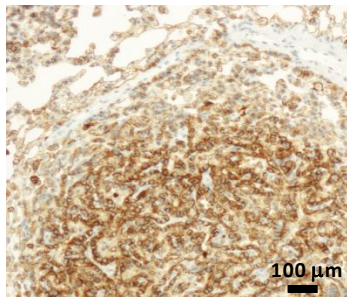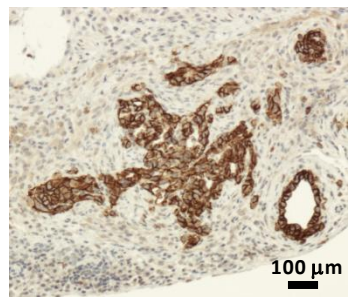

$\beta$ -CATENIN

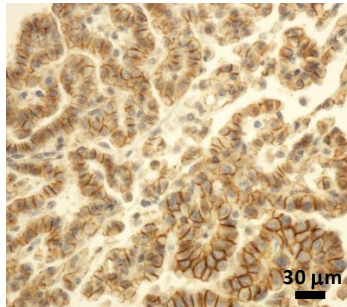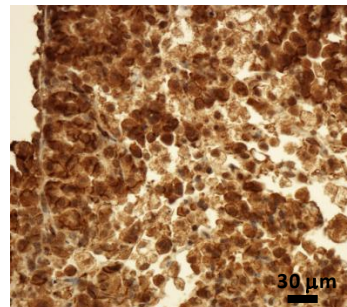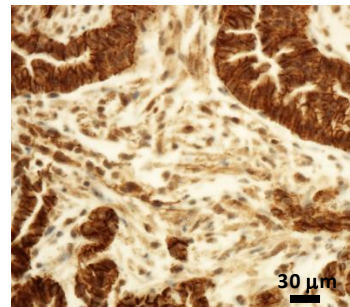

ACTA2

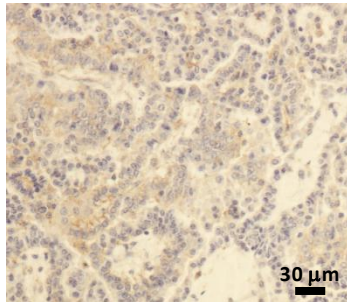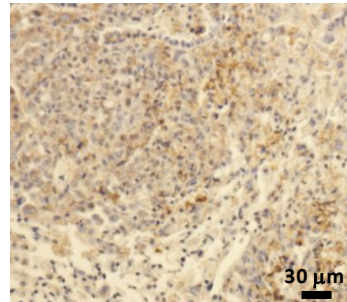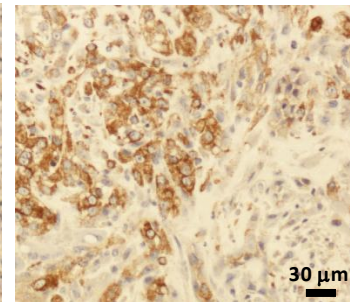

FIBRONECTIN

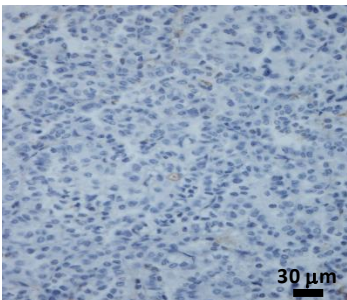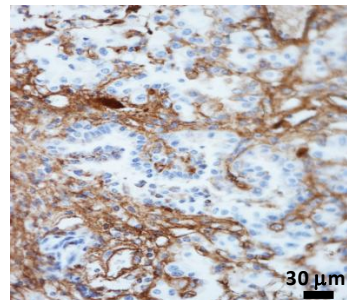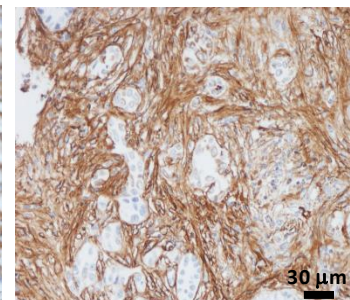

**Figure S1.** Related to Figure 1.

**A.** Gene expression profiles of *Kras* tumors, *Kras/Lkb1* primary tumors as well as *Kras/Lkb1* metastasis were filtered to exclude probesets with signals present at background noise levels, and for probesets that do not vary significantly across samples. Genes and tumors were clustered using average linkage method with the uncentered correlation metric using Gepas analysis tool ([www.gepas.org](http://www.gepas.org)).

**B.** Correlation study of *KRAS* and *LKB1* status and murine Mets signatures in human lung adenocarcinoma samples. Downregulated genes in murine *Kras/Lkb1* metastases (“Mets DOWN” signature) showed a significant correlation with the human samples that are mutant for both *KRAS* and *LKB1* ( $p=0.029$ ). No significant correlation was found for upregulated genes (data not shown).

**C.** Total RNA from *Kras* tumors, *Kras/Lkb1* primary tumors and *Kras/Lkb1* metastases ( $n=5$ ) were reverse-transcribed and then analyzed using RT-PCR and TaqMan probes for indicated transcripts. Glyceraldehyde-3-phosphate dehydrogenase (GAPDH) was used as the reference control. Fold changes were expressed relative to *Kras* primary tumors.

**D.** TGF- $\beta$  multiplex bead analysis. Protein lysates of *Kras* primary tumors, *Kras/Lkb1* primary tumors and *Kras/Lkb1* metastases ( $n=5$ ) were incubated with beads coated with specific antibodies for TGFB1, TGFB2 and TGFB3. Data is graphed as mean pg/100 mg of total protein  $\pm$  SD.

**E.** Expression of EMT protein markers in murine tumors. Representative photomicrographs of sections of *Kras* primary tumors, *Kras/Lkb1* primary tumors and *Kras/Lkb1* metastases immunohistochemically stained with the indicated antibodies.



A

| GS<br>follow link to MSigDB | GS DETAILS                  | SIZE | ES   | NES  | NOM p-val | FDR q-val |
|-----------------------------|-----------------------------|------|------|------|-----------|-----------|
| <a href="#">SRC</a>         | <a href="#">Details ...</a> | 20   | 0.54 | 1.88 | 0.000     | 0.030     |
| <a href="#">INSR</a>        | <a href="#">Details ...</a> | 8    | 0.58 | 1.60 | 0.000     | 0.275     |
| <a href="#">EGFR</a>        | <a href="#">Details ...</a> | 14   | 0.47 | 1.57 | 0.038     | 0.223     |
| <a href="#">PDGFRA</a>      | <a href="#">Details ...</a> | 7    | 0.66 | 1.52 | 0.054     | 0.214     |
| <a href="#">LCK</a>         | <a href="#">Details ...</a> | 8    | 0.51 | 1.41 | 0.075     | 0.301     |
| <a href="#">MET</a>         | <a href="#">Details ...</a> | 6    | 0.61 | 1.38 | 0.114     | 0.289     |
| <a href="#">IGF1R</a>       | <a href="#">Details ...</a> | 5    | 0.64 | 1.38 | 0.152     | 0.254     |
| <a href="#">PDGFRB</a>      | <a href="#">Details ...</a> | 8    | 0.50 | 1.25 | 0.214     | 0.348     |
| <a href="#">PTK2</a>        | <a href="#">Details ...</a> | 13   | 0.41 | 1.18 | 0.261     | 0.401     |
| <a href="#">ERBB2</a>       | <a href="#">Details ...</a> | 7    | 0.52 | 1.15 | 0.313     | 0.379     |
| <a href="#">KIT</a>         | <a href="#">Details ...</a> | 7    | 0.42 | 1.00 | 0.457     | 0.550     |
| <a href="#">ABL1</a>        | <a href="#">Details ...</a> | 6    | 0.42 | 0.91 | 0.571     | 0.692     |
| <a href="#">JAK2</a>        | <a href="#">Details ...</a> | 7    | 0.36 | 0.90 | 0.595     | 0.659     |
| <a href="#">RET</a>         | <a href="#">Details ...</a> | 8    | 0.29 | 0.72 | 0.818     | 0.895     |
| <a href="#">FYN</a>         | <a href="#">Details ...</a> | 7    | 0.21 | 0.50 | 1.000     | 0.983     |

**Kras/Lkb1 vs Kras tumors (FDR = 0.234)**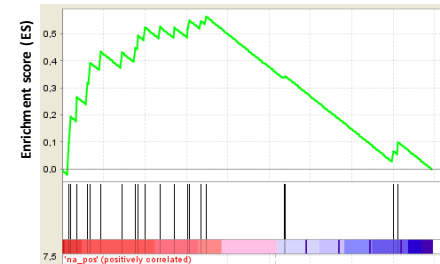**Kras/Lkb1 mets vs Kras tumors (FDR = 0.03)**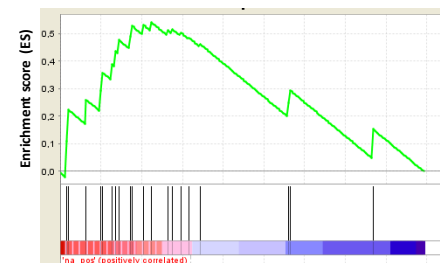

B

**Phosphoproteins deregulated in *Kras/Lkb1* compared to *Kras* primary tumors****KEGG pathway**

Leukocyte transendothelial migration  
 Jak-STAT signaling pathway  
 ErbB signaling pathway  
 Tight junction  
 Adipocytokine signaling pathway  
 Cell adhesion molecules (CAMs)  
 Focal adhesion  
 VEGF signaling pathway  
 Regulation of actin cytoskeleton

**Protein**

PXN, F11R, PIK3R1, PTK2, PTPN11, CLDN3, PECAM1, CLDN18  
 STAT3, STAT5A, STAT5B, PIK3R1, PTPN11, JAK1  
 SRC, STAT5A, STAT5B, PIK3R1, PTK2, ABL1, SHC1  
 SRC, F11R, CLDN3, PRKCD, MYH9, CLDN18  
 STAT3, PTPN11, JAK1  
 F11R, CLDN3, PECAM1, CLDN18  
 PXN, SRC, PIK3R1, PTK2, SHC1, ACTN1, TLN1, VCL  
 PXN, SRC, PIK3R1, PTK2  
 PXN, PIK3R1, PTK2, ACTC1, MYH9

**Phosphoproteins deregulated in *Kras/Lkb1* mets compared to *Kras/Lkb1* primary tumors****KEGG pathway**

ErbB signaling pathway  
 Insulin signaling pathway  
 Regulation of actin cytoskeleton  
 Leukocyte transendothelial migration  
 Natural killer cell mediated cytotoxicity  
 Jak-STAT signaling pathway  
 Gap junction  
 Tight junction  
 Adherens junction  
 Cell adhesion molecules (CAMs)  
 Acute myeloid leukemia  
 Focal adhesion  
 VEGF signaling pathway  
 Axon guidance  
 Dorso-ventral axis formation  
 mTOR signaling pathway

**Protein**

SRC, STAT5A, STAT5B, PTK2, ABL1, MAPK3, SHC1, MAPK1  
 MAPK3, TSC1, SHC1, MAPK1  
 PTK2, MAPK3, ACTC1, MYH10, MAPK1  
 CDH5, F11R, PTK2, PTPN11, CLDN3, PECAM1, CLDN18, NOX3  
 MAPK3, PTPN11, SHC1, MAPK1  
 STAT3, STAT5A, STAT5B, PTPN11, JAK1  
 SRC, MAPK3, TJP1, MAPK1  
 SRC, F11R, CLDN3, TJP1, MYH6, MYH10, CLDN18  
 SRC, MAPK3, TJP1, LMO7, MAPK1  
 CDH5, F11R, CLDN3, PECAM1, CLDN18  
 STAT3, STAT5A, STAT5B, MAPK3, CEBPA, MAPK1  
 SRC, PTK2, MAPK3, SHC1, MAPK1  
 SRC, PTK2, MAPK3, MAPK1  
 PTK2, ABL1, MAPK3, MAPK1  
 MAPK3, ETS1, MAPK1  
 MAPK3, TSC1, MAPK1

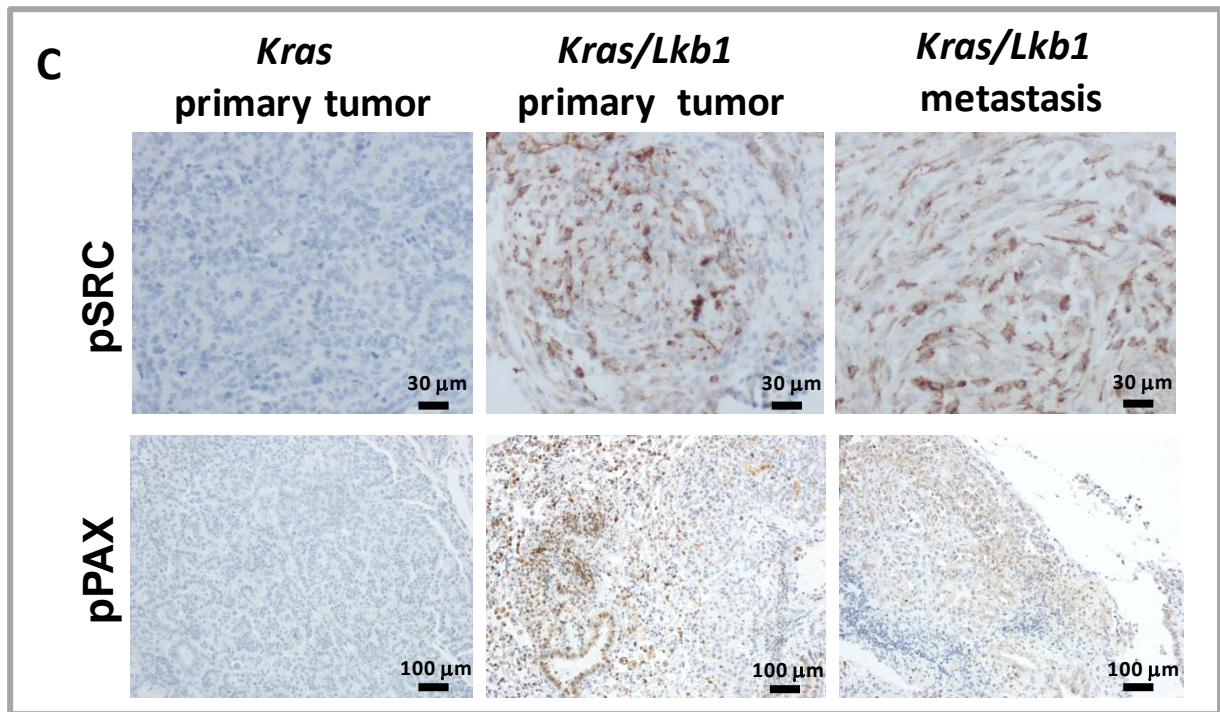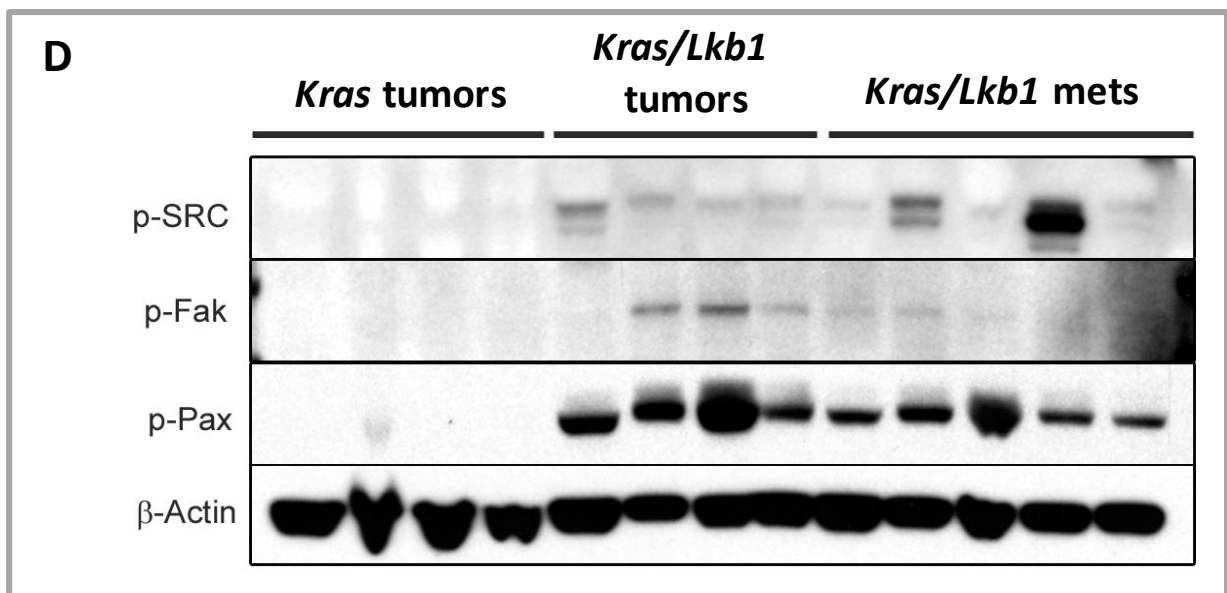

**Figure S2.** Related to Figure 2. Phosphoprotein profiling of murine tumors.

**A.** GSEA analysis of tyrosine kinase substrates sets confirms a significant enrichment of SRC substrates in *Lkb1* deficient murine tumors. Gene set enrichment analysis method was adapted to evaluate the enrichment of tyrosine kinase substrates sets in the murine phosphoprotein dataset. Log<sub>2</sub> ratios of *Kras/Lkb1* primary tumors versus *Kras* primary tumors and *Kras/Lkb1* metastases versus *Kras* primary tumors were calculated, ranked and loaded in GSEA program ([www.broadinstitute.org/gsea](http://www.broadinstitute.org/gsea)). Left table: enrichment scores (ES), statistical significance of the enrichment (NOM p-val) and multiple hypothesis testing adjustment (FDR q-val) for the substrate sets tested. Right plots: location of the maximum enrichment score (ES) and the leading-edge subsets of Src substrates in *Kras/Lkb1* primary versus *Kras* tumors (detectable albeit not statistically significant enrichment) and *Kras/Lkb1* metastases versus *Kras* primary tumors (statistically significant enrichment, FDR<0.05).

**B.** KEGG classification of deregulated phosphotyrosine proteins in *Kras/Lkb1* tumors and metastases. Phosphoproteins that changed at least two fold or more in indicated comparisons, were classified into KEGG pathways using FatiGO software ([www.babelomics.org](http://www.babelomics.org)).

**C.** Src/FAK tyrosine hyperphosphorylation in *Kras/Lkb1* primary tumors and metastasis analyzed by immunohistochemistry. Representative photomicrographs of sections of *Kras* primary tumors, *Kras/Lkb1* primary tumors and *Kras/Lkb1* metastases immunohistochemically stained with the indicated phosphotyrosine specific antibodies for Src (Y416) and paxillin (Y118).

**D.** Tyrosine phosphorylation of Src, FAK and paxillin in *Kras/Lkb1* murine tumors. Whole cell extracts of *Kras* primary tumors, *Kras/Lkb1* primary tumors, and *Kras/Lkb1* metastases were immunoblotted with the indicated antibodies specific for Src (Y416), FAK (Y576/577), and paxillin (Y118), and  $\beta$ -Actin.



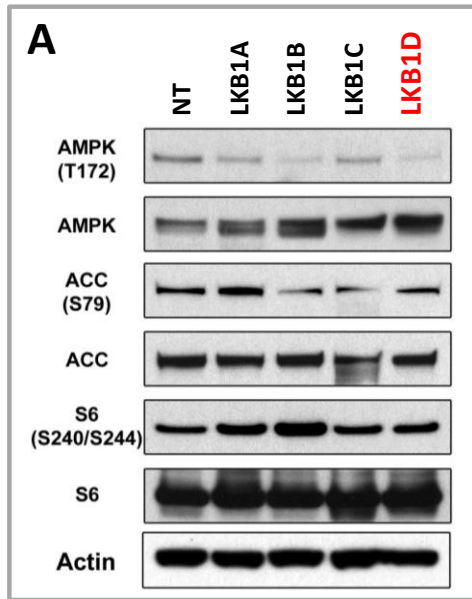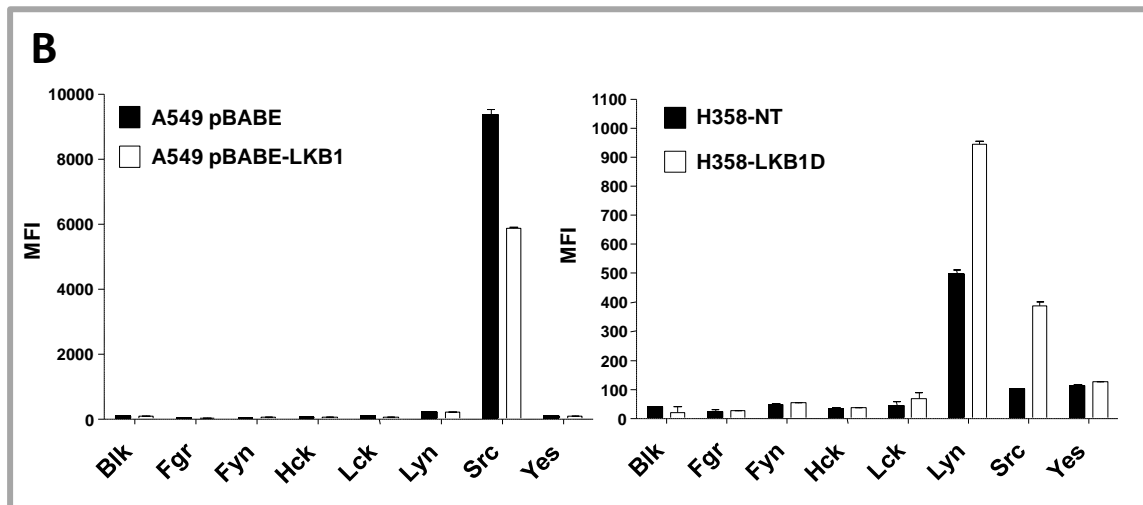

**C**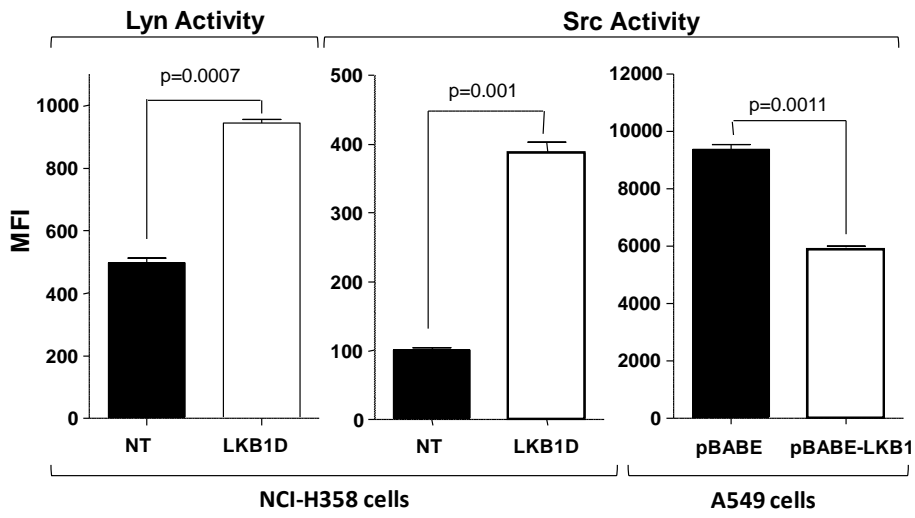

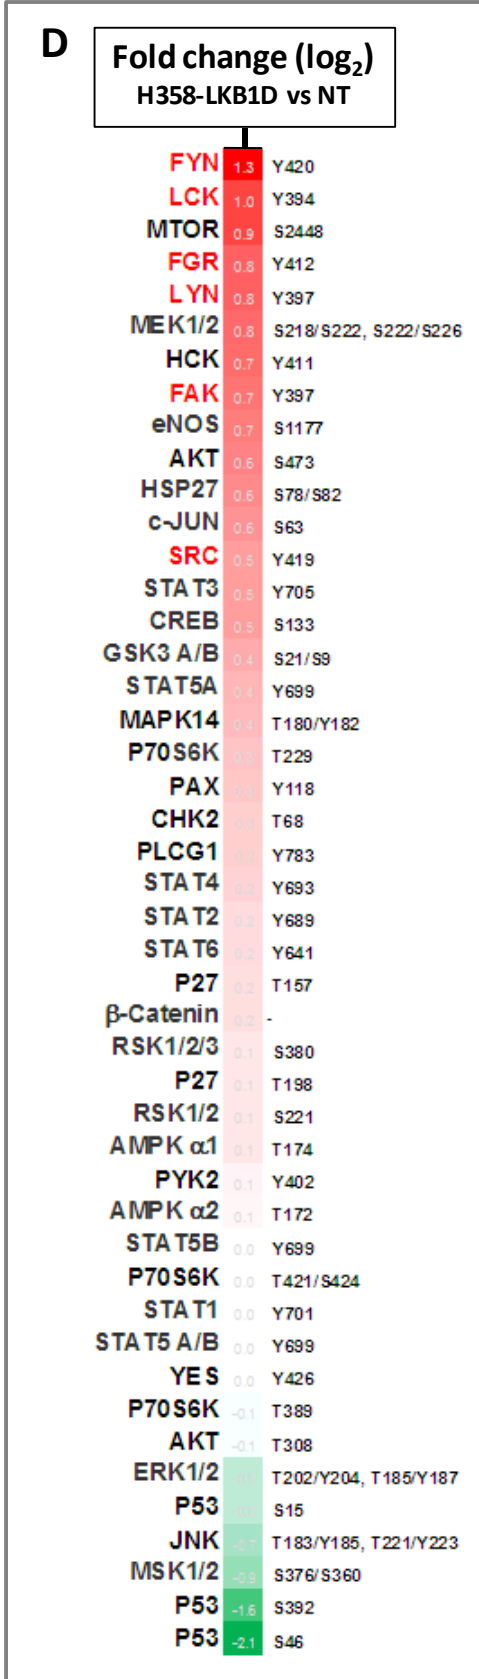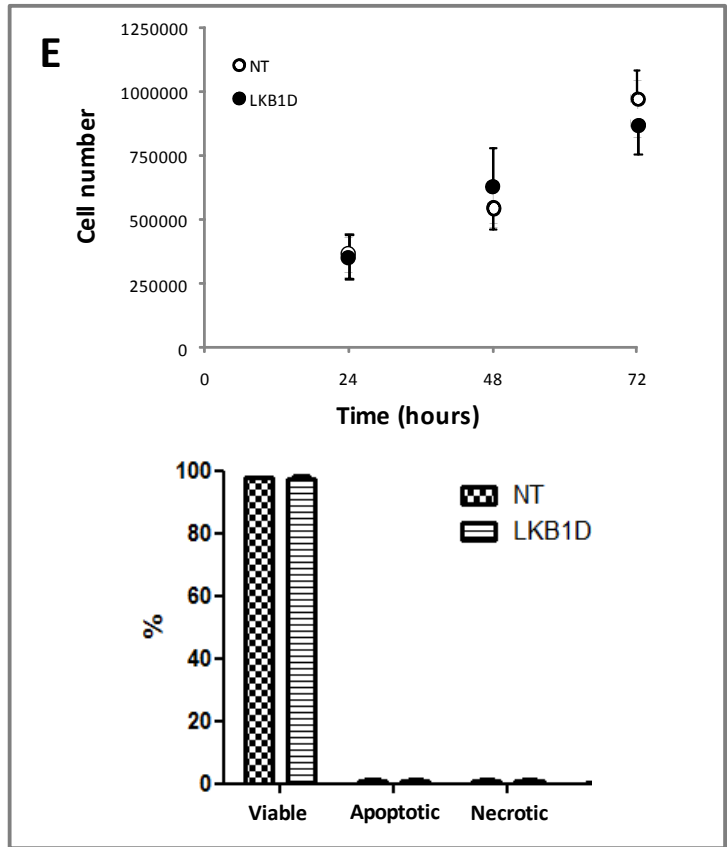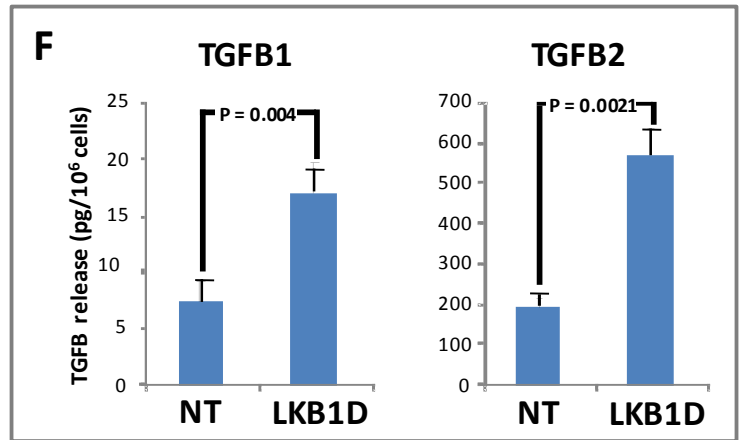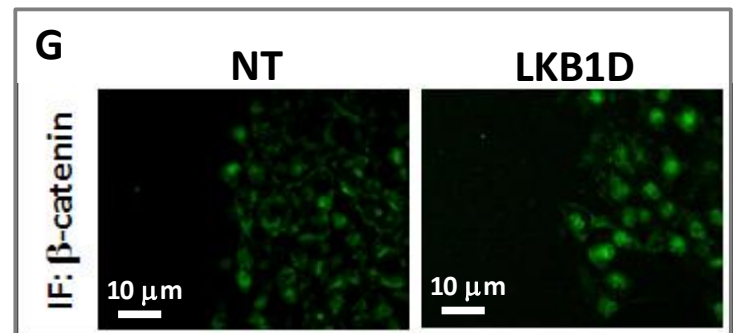

**Figure S3.** Related to Figure 4.

**A.** Western blot of protein lysates from NCI-H358 cells transduced with non-targeting (NT) or *LKB1* shRNA (LKB1D) were performed with specified antibodies (ACC = Acetyl-CoA carboxylase).

**B.** Tyrosine phosphorylation status of SRC family members were carried out in NCI-H358 cells stably expressing shRNA to *LKB1* (LKB1D) or a non-specific shRNA (NT), and A549 cells stably expressing pBabe empty or pBabe-*LKB1* wild type as described in Methods. Data is graphed as mean of 3 replicates  $\pm$  SD.

**C.** Magnification of histograms shown in B, focused on predominant SRC family members in each cell line.

**D.** Phosphoprotein profile of NCI-H358 cells analyzed by protein arrays.

NCI-H358 cells stably expressing shRNA to *LKB1* (LKB1D) or a non-specific shRNA (NT) were subjected to a kinase array as described in materials in methods. Densitometric analysis was performed and normalized for background and array lot variations. Differences were expressed as  $\text{Log}_2$  ratio and depicted as a heatmap, demonstrating the activation of Src family kinases and FAK, as well as MEK and AKT, in *LKB1* knockdown cells. In each array, each kinase was assayed in duplicate (two dots).

**E.** Cell proliferation and cell death in NCI-H358 lung cancer cells. NCI-H358 cells transduced with non-targeting (NT) or *LKB1* shRNA (LKB1D) were counted every 24 hours during 3 days. Annexin V and propidium iodide staining of apoptotic and/or necrotic cells were performed at 72 hours. Data is graphed as mean of 3 replicates  $\pm$  SD.

**F.** TGF- $\beta$  release analyzed by multiplex bead assay. *In vitro* secretion of TGFB1, TGFB2 and TGFB3 (below detection limit, not shown) were carried out in NCI-H358 cells stably expressing shRNA to *LKB1* (LKB1D) or a non-specific shRNA (NT). Conditioned media were collected after

24h of cell culture and incubated with beads coated with specific antibodies for TGFB1, TGFB2 and TGFB3 as described in Methods. Data is graphed as mean of 3 replicates (pg/10<sup>6</sup> cells ± SD).

**G.**  $\beta$ -catenin immunostaining in NCI-H358 lung cancer cells. Confluent monolayers of NCI-H358 cells transduced with non-targeting (NT) or *LKB1* shRNA (LKB1D) were scratched, incubated for 12 hours and fixed and stained with a specific antibody for activated  $\beta$ -catenin as described in materials and methods. Representative photographs captured with a fluorescence microscope showed nuclear localization of  $\beta$ -catenin in NCI-H358 lacking *LKB1*.



## Supplemental Tables

**Table S1.** Related to Figure 1. Gene sets used in gene set enrichment analysis.

See Excel file

**Table S2.** Related to Figure 6. Histological evaluation of *Kras/Lkb1* mice treated with Dasatinib.

|                               | <b>n</b> | <b>Lymph node/distant metastases</b> |
|-------------------------------|----------|--------------------------------------|
| <b>Untreated mice</b>         | 10       | 7 (70%)                              |
| <b>Dasatinib treated mice</b> | 5        | 0                                    |
| <b>P value</b>                |          | 0.026                                |

**Table S3.** Related to Figure 6.

GSEA analysis of primary tumors from *Kras/Lkb1* mice daily treated with Dasatinib, AZD/BEZ or AZD/BEZ/Dasatinib for 48 hours with doses indicated in Figure 6. Columns show enrichment results for each comparison. A positive or negative enrichment score (NES) represent respectively an up or down-regulation of the gene signature in the first class for each comparison.

See Excel file

## **Supplemental experimental procedures**

### **Gene expression profiling**

Total RNA from the primary tumors and metastases was extracted by Trizol (Invitrogen) and purified with an RNeasy kit (Qiagen). Synthesis of cRNA and hybridization to Mouse Expression Array 430A 2.0 chips or Mouse Gene 1.0 ST chips were performed following Affymetrix protocols (Affymetrix, Inc.). Probe-level intensity data files in the CEL format were pre-processed using Robust Multichip Average program ([rmaexpress.bmbolstad.com](http://rmaexpress.bmbolstad.com)). Gene-expression data were filtered using low stringency, pre-defined criteria: probe set intensity (32 in all samples) and dynamic variation (more than twofold over the entire sample set). After filtering, probes representing the same genes were collapsed into a single value, and standardized by taking the median value for each gene across sample set. Unsupervised hierarchical clustering was performed using Gepas Analysis suite ([www.gepas.org](http://www.gepas.org)). Two-sided t-tests were used to determine significant differences in gene expression between mice cohorts. False positives associated with multiple hypothesis testing were calculated with the False Discovery Rate method. Differentially expressed genes were  $\log_2$  transformed, mean-centered and depicted using the GenePattern software ([genepattern.broadinstitute.org](http://genepattern.broadinstitute.org))

### **Western blot**

Whole-cell lysates (WCL) were prepared in lysis buffer (Cell Signaling Technology) supplemented with protease and phosphatase inhibitor cocktails (Calbiochem). Protein concentrations were determined using the bicinchoninic acid protein assay kit (Pierce)

and equivalent amounts (20 µg) were subjected to SDS-PAGE on 4% to 12% Bis-Tris gradient gels.

### **Phosphopeptide immunoprecipitation, LC-MS/MS and phosphopeptide analysis.**

Soluble protein extracts from cell cultures and tumor tissues were digested with Trypsin, and phosphorylated peptides were isolated using slurries of phosphotyrosine mouse monoclonal immobilized antibody. For LC-MS/MS analysis, mass spectra were collected with an LTQ-Orbitrap hybrid mass spectrometer (Thermo Scientific), and evaluated using TurboSequest in the Proteomics Browser package (v.27, rev.13).

Searches were performed against the NCBI human database, released on September 5, 2006 and containing 34,180 protein sequences, in both forward- and reversed-sequence directions. The false positive assignment rate was approximated by taking the ratio of the reversed database assignments to the forward database assignments after filtering the initial SEQUEST search results based on XCorr ( $\geq 1.5$ ) and mass accuracy ( $\pm 10$  ppm). Each MS/MS spectrum arises from a parent ion observed during a survey MS scan was linked to the intensity of that parent ion at its chromatographic apex, essentially measuring the abundance of the peptide in the sample. An intensity of 20,000 counts was estimated when the peptide is not detected in a particular sample.

### **Invasion assay.**

Assays were performed in Boyden chambers with matrigel precoated 8-µm pore filter inserts for 24-well plates (Cell Biolabs Inc.). H358 cells ( $5 \times 10^5$ ) in 200 µl of serum-free medium were added to the upper chamber with the filters precoated with

Matrigel. The lower chamber was filled with 300  $\mu$ l of medium containing 10% fetal bovine serum as attractant. After 48 hours of incubation at 37°C, cells on the underside of the filter were fixed, stained, and extracted with 10% citric acid, and the optical density was measured at 560 nm by spectrophotometer for quantification of cell number.

#### **Cell adhesion assay.**

H358 cells were seeded at  $5 \times 10^5$  cells in wells coated with collagen I or collagen IV or BSA coated multi-well plates (Cell Biolabs, Inc.). Cells were allowed to adhere to the matrices for 90 minutes, washed three times with PBS with calcium and magnesium and then fixed and stained following manufacturer's instructions.

#### **Magnetic resonance imaging and tumor volume measurement.**

MRI was done with a 4.7T Bruker Avance horizontal bore system equipped with a 200-mm inner diameter gradient set capable of 30 G  $\text{cm}^{-1}$  gradient strength. Tumor-bearing mice were anesthetized with 1% isoflurane in an oxygen-air mixture. Respiratory and cardiac rates of the mice were monitored with Biotrig Software. We compared tumor volumes of mice treated with different therapies using a two-sided Student's exact *t*-test.

## Antibodies

| Target          | Phosphosite | Company           | Cat. #      | Application | Remarks                                  |
|-----------------|-------------|-------------------|-------------|-------------|------------------------------------------|
| LKB1            |             | Cell Signaling    | 3050        | WB          | (27D10) Rabbit mAb                       |
| Src             |             | Cell Signaling    | 2108        | WB          |                                          |
| Src             | Y416        | Cell Signaling    | 2101        | WB/IHC      | Phospho-Src Family                       |
| FAK             |             | Cell Signaling    | 3285        | WB          |                                          |
| FAK             | Y576/577    | Cell Signaling    | 3281        | WB          |                                          |
| E-Cadherin      |             | Cell Signaling    | 4065        | WB          |                                          |
| Vimentin        |             | BioVision         | 3634-100    | WB          |                                          |
| Paxillin        | Y118        | Cell Signaling    | 2541        | WB/IHC      |                                          |
| $\beta$ -Actin  |             | Cell Signaling    | 4967        | WB          |                                          |
| AMPK            |             | Cell Signaling    | 2603        | WB          | (23A3) Rabbit mAb                        |
| AMPK            | T172        | Cell Signaling    | 2535        | WB          | (40H9) Rabbit mAb<br>(C83B10) Rabbit mAb |
| ACC             |             | Cell Signaling    | 3676        | WB          | mAb                                      |
| ACC             | S79         | Cell Signaling    | 3661        | WB          |                                          |
| S6              |             | Cell Signaling    | 2217        | WB          | (5G10) Rabbit mAb                        |
| S6              | S240/S244   | Cell Signaling    | 2215        | WB          |                                          |
| Beta-catenin    |             | Cell Signaling    | 9587        | IHC         |                                          |
| Beta-catenin    |             | Millipore         | 05-665      | IF          | (8E7) Mouse mAb                          |
| Fibronectin     |             | Lab Vision        | RB-077-A0,  | IHC         |                                          |
| ACTA2           |             | Novus Biologicals | NB110-55432 | IHC         |                                          |
| E-Cadherin      |             | Cell Signaling    | 3195        | IHC         |                                          |
| Vimentin        |             | DAKO              | M7020       | IHC         | VIM3B4 Mouse mAb                         |
| Pan-cytokeratin |             | DAKO              | IR053       | IHC         |                                          |

## Real time PCR TaqMan probes (Applied Biosystems)

| Gene   | TaqMan probe  |
|--------|---------------|
| Twist1 | Mm00442036_m1 |
| Cdh1   | Mm01247350_m1 |
| Vim    | Mm00449201_m1 |
| Cdh2   | Mm00483208_m1 |
| Fn1    | Mm01263588_m1 |
| Acta2  | Mm01546133_m1 |
| Snai1  | Mm01249564_g1 |



### shRNA constructs (Openbiosystems)

| <b>Designation</b> | <b>Sequence</b>       | <b>RNAi Consortium number</b> |
|--------------------|-----------------------|-------------------------------|
| NT                 | CAACAAGATGAAGAGCACCAA | -                             |
| LKB1A              | GAGTGTGCGGTCAATATTTAT | TRCN0000000407                |
| LKB1B              | GATCCTCAAGAAGAAGAAGTT | TRCN0000000409                |
| LKB1C              | GAAGAAGAAGTTGCGAAGGAT | TRCN0000000410                |
| LKB1D              | CATCTACTCAGGACTTCAC   | TRCN0000000411                |
